# Supplementary material
Source: Springer Nature journal article supplement (https://www.springermedizin.de/resource/supplementary/12936_2011_1784_MOESM2_ESM.pdf/9541702)
Supplement: MOESM2 [file 9541702]

G3, *An. gambiae*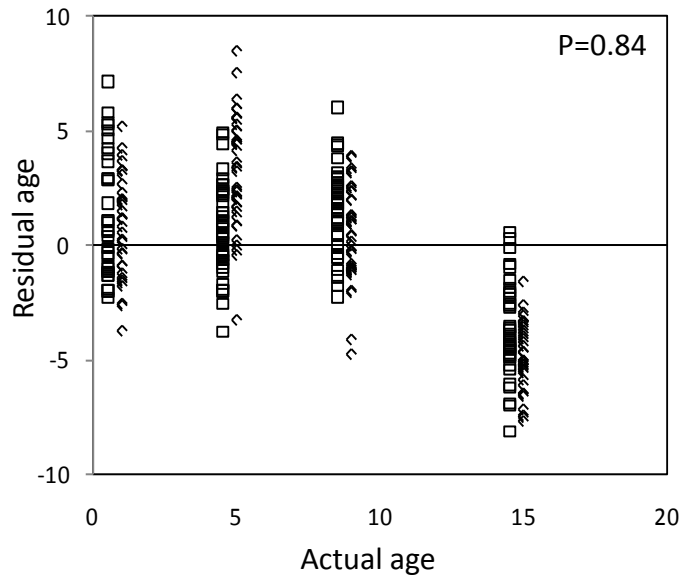Dongola, *An. arabiensis*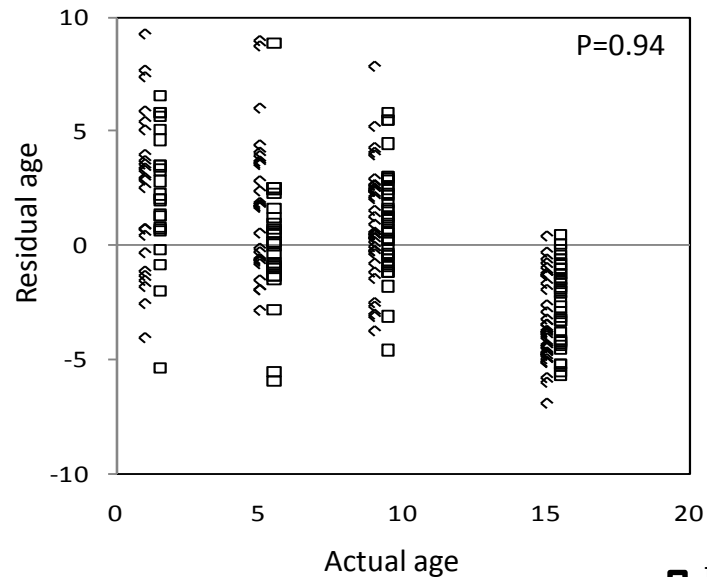KGB, *An. arabiensis*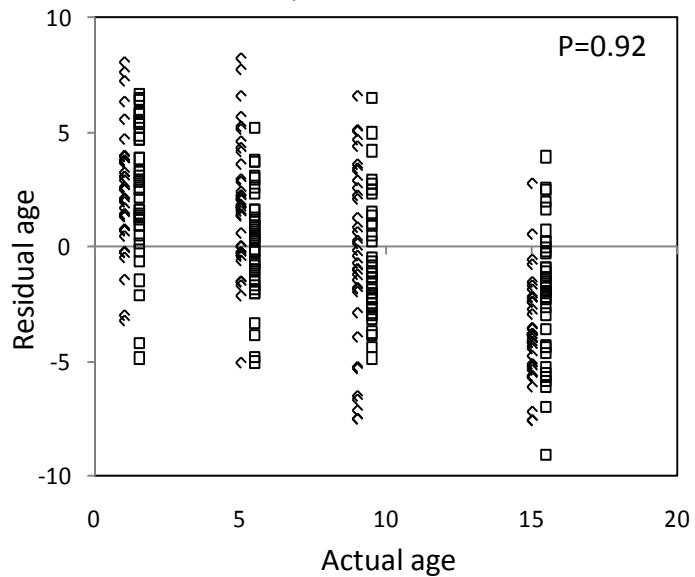Ifakara, *An. arabiensis*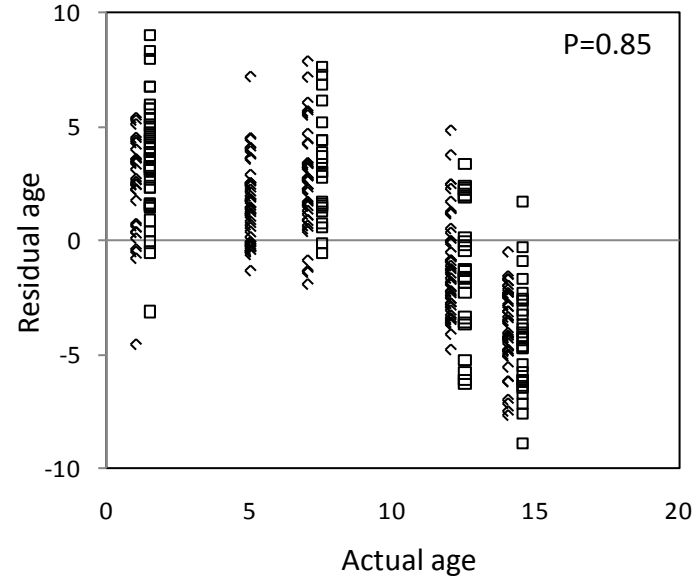

□ fresh

◇ RNAlater® preserved
